# Supplementary material for: Xylosandrus crassiusculus (Motschulsky) on Cocoa Pods (Theobroma cacao L.): Matter of Bugs and Fungi
Source: MDPI journal article supplement (doi:10.3390/insects13090809), 2022-09-05
Supplement: s1 [file s1]

**Table S1:** details of the survey conducted on distribution of *X. crassiusculus* in cocoa in Karnataka

| <b>Village</b> | <b>Latitude</b> | <b>Longitude</b> | <b>Age of plantation<br/>(Year)</b> | <b>Infested<br/>plantation<br/>(%)</b> |
|----------------|-----------------|------------------|-------------------------------------|----------------------------------------|
| Murulya        | 12° 41' 17.717" | 75° 24' 52.362"  | 13                                  | Absent                                 |
| Boonadka       | 12° 41' 57.541" | 75° 36' 3.480"   | 9                                   | Absent                                 |
| Alankar        | 12° 46' 42.289" | 75° 20' 54.181"  | 11                                  | Absent                                 |
| Jogogara       | 13° 32' 41.437" | 75° 23' 45.535"  | 12                                  | Absent                                 |
| Khandya        | 13° 32' 52.566" | 75° 25' 7.636"   | 7                                   | Absent                                 |
| Enekallu       | 12°40' 45.29"   | 75° 29' 32.913"  | 11                                  | Absent                                 |
| Periyadka      | 12°49' 18.905"  | 75° 17' 41.812"  | 9                                   | Absent                                 |
| Bantra         | 12°44' 31.884"  | 75° 30' 1.681"   | 12                                  | Absent                                 |
| Puttur         | 12°48' 31.849"  | 75° 16' 1.18"    | 15                                  | 1.45                                   |
| Vittal         | 12° 46' 43.60"  | 75° 06' 58.60"   | 14                                  | 4.54                                   |
